# Supplementary material for: Expansion of the glycosynthase repertoire to produce defined manno-oligosaccharides
Source: Royal Society of Chemistry journal article supplement (doi:10.1039/b302380j), 2003-01-01
Supplement: b302380j.doc [file b302380j.doc]

Expansion of the Glycosynthase Repertoire to Produce Defined Manno-Oligosaccharides

Michael Jahn,*a* Dominik Stoll,*b* R. Antony J. Warren*b*, **Lóránd Szabó**,*c* Pritpal Singh,*c* Harry J. Gilbert,*c* Valérie M.-A. Ducros*d*, Gideon J. Davies*d* and Stephen G. Withers*a*

a, b Department of Chemistry and Microbiology, University of British Columbia, 2036 Main Mall, Vancouver, B.C. V6T 1Z1, Canada. Fax: (+1) 604-822-2847; Tel: (+1) 604-822-3402; E-mail: withers@chem.ubc.ca

c School of Cell and Molecular Biosciences, University of Newcastle upon Tyne, Newcastle upon Tyne NE1 7RU, United Kingdom

d Structural Biology Laboratory, Department of Chemistry, The University of York, Heslington, UK Y010 5YW. E-mail: davies@ysbl.york.ac.uk

**General:**

1H and 13C NMR spectra were recorded on Bruker Avance-300 or Avance-400 Spectrometers. Chemical shifts are reported in  units (ppm) using residual 1H and 13C signals of the deuterated solvents as reference: H (CHCl3) 7.26, H (CH3OH) 3.31, C (CDCl3) 77.0, C (CD3OD) 49.0. In aqueous NMR-samples internal acetone was used as reference: H (CH3COCH3) 2.22. Electrospray mass spectra were recorded on a PE Sciex API 300 LC/MS/MS instrument by direct injection of the compounds in a 1:1 CH3CN/ H2O solution. Silica gel 60 (230-400 mesh) from SiliCycle was used for column chromatography. The petroleum ether used for column chromatography had a boiling point range from 35-60C. All reagents and solvents were purchased from Aldrich, Fluka, Sigma or Fisher Scientific. Ivory nut mannan was purchased from Megazyme. Solvents were dried over CaH2 (CH2Cl2, pyridine, toluene, acetonitrile), over Mg (methanol) or over molecular sieves 4Å (DMF). All reactions were carried out under a dry nitrogen atmosphere.

**Chemical Synthesis of the donor (-mannobiosyl fluoride):**

***2, 3, 6-Tri-O-acetyl-4-O-(2, 3, 4, 6-tetra-O-acetyl--D-mannopyranosyl)--D-manno-pyranosyl fluoride* (1)**

A suspension of ivory nut mannan (1 g) in phosphate buffer (50 mM, pH~7, 0.02% NaN3) was incubated for 4 d at 37C with wildtype Man26A from *Cellulomonas fimi*. The mixture was freeze dried, and then pyridine (20 ml) and Ac2O (10 ml) were added. After stirring for 24 h under N2 at room temperature the mixture was poured onto ice/ H2O (100 ml) and extracted with CH2Cl2. The organic layer was washed sequentially with saturated aqueous NaHCO3, 1 M HCl and brine, dried over MgSO4, filtered and concentrated *in vacuo*. Column chromatography with EtOAc/ Pet. Ether (1:1) afforded peracetylated mannose (490 mg, 27%) and an anomeric mixture of peracetylated mannobiose as a white foam (840 mg, 48%), ESI-MS: *m/z* = 701.4 [M + Na]+ (expected for C28H38O19Na+: *m/z* = 701.2).

To the anomeric mixture of peracetylated mannobiose (820 mg, 1.2 mmol) in a 15 ml plastic vial was added HF/ py (15 ml) at -15C. The mixture was kept for 2 h at this temperature and then poured onto ice cold saturated NaHCO3 (250 ml). Extraction with CH2Cl2 and sequential washing of the organic layer with saturated aqueous NaHCO3, 1 M HCl and brine, drying over MgSO4 and concentration *in vacuo* yielded **1** as a colorless oil (600 mg, 78%); 1H-NMR (400 MHz): H (CDCl3): 5.50 (dd, 1 H, *J*1,F 53.6 Hz, *J*1,2 1.7 Hz, H-1), 5,43 (m, 1 H, H-3), 5.41 (m, 1 H, H-2'), 5.34 (d, 1 H, *J*2,1 1.7 Hz, H-2), 5.19 (t, 1 H, *J*4',3' = *J*4',5' 9.8 Hz, H-4'), 5.03 (dd, 1 H, *J*3',4' 9.8 Hz, *J*3',2' 3.3 Hz, H-3'), 4.74 (d, 1 H, *J*1',2' 0.9 Hz, H-1'), 4.39 (dd, 1 H, *J*6,6 12.3 Hz, *J*6,5 2.1 Hz, H-6), 4.29 (dd, 1 H, *J*6'6' 12.2 Hz, *J*6',5' 1.6 Hz, H-6'), 4.28 (d, 1 H, *J*6,6 12.3 Hz, H-6), 4.11 (m, 1 H, H-5), 4.10 (m, 1 H, H-6'), 4.05 (m, 1 H, H-4), 3.64 (m, 1 H, H-5'), 2.16, 2.14, 2.13, 2.08, 2.07, 2.04, 1.98 (7xs, 21 H, 7xAc), 13C-NMR (75 MHz): C (CDCl3): 170.6, 170.5, 170.4, 170.3, 169.9, 169.7, 169.5, 169.4, 169.4, 104.7 (d, *J*C-1,F 225 Hz, C-1), 97.5, 72.5, 72.0, 71.3 (d, *J* 3 Hz), 70.6, 68.3, 68.2 (d, *J* 40 Hz), 67.7, 65.9, 62.6, 62.1, 20.7, 20.6, 20.5, ESI-MS: *m/z* = 661.0 [M + Na]+ (expected for C26H35FO17Na+: *m/z* = 661.2).

***4-O-(--D-mannopyranosyl)--D-mannopyranosyl fluoride (-mannobiosyl fluoride)* (2)**

NH3 was bubbled at 0C for ~3 min through a solution of **1** (550 mg, 0.86 mmol) in MeOH (10 ml). After 3 h at 0C the solvent was removed *in vacuo*. Column chromatography on silica (EtOAc/ MeOH/ H2O 16:3:1  7:3:1) and crystallization from MeOH/ H2O/ Et2O yielded **2** (227 mg, 77%); 1H-NMR (400 MHz): H (D2O): 5.64 (dd, 1 H, *J*1,F 50 Hz, *J*1,2 1.5 Hz, H-1), 4.75 (m, 1 H, H-1'), 4.17 (s, 1 H, H-2), 4.06 (d, 1 H, *J*2',3' 3.1, H-2'), 3.99 (m, 1 H, H-3), 3.97 (m, 1 H, H-6), 3.94 (m, 1 H, H-6'), 3.88 (m, 2 H, H-4, H-6), 3.77 (m, 1 H, H-5), 3.73 (dd, 1 H, *J*6',6' 12.3 Hz, *J*6',5' 6.8 Hz, H-6'), 3.65 (dd, 1 H, *J*3',4' 9.6 Hz, *J*3',2' 3.1 Hz, H-3'), 3.56 (t, 1 H, *J*4',5' = *J*4',3' 9.6 Hz, H-4'), 3.43 (m, 1 H, H-5'), C (D2O): 107.4 (d, *J*C-1,F 221 Hz, C-1), 99.84, 76.3, 75.5, 73.2, 72.6, 70.4, 68.4, 68.0 (d, *J* 36 Hz), 66.5, 60.9, 59.9, ESI-MS: *m/z* = 367.3 [M + Na]+ (expected for C12H21FO10Na+: *m/z* = 367.1).

**Enzymatic synthesis of manno-oligosaccharides:**

Phosphate buffered solutions (170 mM, pH 7.3) of pNP -D-glucopyranoside or pNP -D-mannopyranoside (30 mM) and **2** (50 mM) were incubated with *Cellvibrio japonicus* Man26A E320G (0.3 mg/ ml) for 3 days at room temperature. After lyophilization standard per-*O*-acetylation with pyridine/ Ac2O and subsequent workup was performed. The final purification by column chromatography (3:1  1:2 Pet. Ether/ EtOAc) yielded the per-*O*-acetylated products.

**pNP -D-glucopyranoside as acceptor:**

**-D-Man-(14)--D-Man-(14)--D-Glc-OpNP** (12 mg, 36%), 1H-NMR (400 MHz) and 13C-NMR (75 MHz) data were the same as described by O. Nashiru, D.L. Zechel, D. Stoll, T. Mohammadzadeh, R.A.J. Warren, S.G. Withers, Angew. Chem. Int. Ed., (2001), 40 (2), 417-420, ESI-MS: *m/z* = 1068.5 [M + Na]+ (expected for C44H55NO28Na+: *m/z* = 1068.3).

**-D-Man-(14)--D-Man-(14)--D-Man-(14)--D-Man-(14)--D-Glc-OpNP** (9 mg, 18%), 1H-NMR (400 MHz), H (CDCl3): 8.20 (m, 2 H, Ar), 7.05 (m, 2 H, Ar), 5.40 (d, 1 H, *J*2'''',3'''' 3.1 Hz, H-2''''), 5.37-5.31 (m, 3 H, H-2', H-2'', H-2'''), 5.30 (t, 1 H, *J*3,2 = *J*3,4 8.8 Hz, H-3), 5.25-5.13 (m, 3 H, H-1, H-2, H-4''''), 5.12-5.03 (m, 3 H, H-3', H-3'', H-3'''), 5.01 (dd, 1 H, *J*3'''',4'''' 9.9 Hz, *J*3'''',2'''' 3.1 Hz, H-3''''), 4.69 (s, 1 H, H-1''''), 4.67-4.62 (m, 3 H, H-1', H-1'', H-1'''), 4.45-4.10 (m, 9 H, 2x H-6, 2x H-6', 2x H-6'', 2x H-6''', H-6''''), 4.07 (m, 1 H, H-6''''), 3.95-3.80 (m, 5 H, H-4, H-4', H-4'', H-4''', H-5), 3.67-3.46 (m, 4 H, H-5', H-5'', H-5''', H-5''''), ESI-MS: *m/z* = 1644.5 [M + Na]+ (expected for C68H87NO44Na+: *m/z* = 1644.5).

**ManMan ManManManManGlc-OpNP**

(4 mg, 5%), ESI-MS: *m/z* = 2221.0 [M + Na]+ (expected for C92H119NO60Na+: *m/z* = 2220.6).

**pNP -D-mannopyranoside as acceptor:**

**-D-Man-(14)--D-Man-(14)--D-Man-OpNP** (19.5 mg, 32%), 1H-NMR (400 MHz) and 13C-NMR (75 MHz) data were the same as described by O. Nashiru, D.L. Zechel, D. Stoll, T. Mohammadzadeh, R.A.J. Warren, S.G. Withers, Angew. Chem. Int. Ed., (2001), 40 (2), 417-420, ESI-MS: *m/z* = 1068.8 [M + Na]+ (expected for C44H55NO28Na+: *m/z* = 1068.3).

**HPLC analysis of glycosynthase reactions:**

HPLC analysis was performed using a Waters 600E multisolvent delivery system with acetonitrile (A)/ water (B) as mobile phase (linear gradient: 70% A 35% A in 15 min, flow: 1 ml min-1), a Waters 2486 Dual  Absorbance Detector (detection at 280 nm), a TOSO HAAS Amide 80 column (4.6 x 250 mm) and Millenium 3.20 software. Samples were diluted 1:5 with acetonitrile and filtered through 0.22 m filters before injection.

**Table of X-ray data and structure quality:**

| Resolution of data (outer shell), Å | 30-1.4 (1.45-1.40) |
| --- | --- |
| R merge (outer shell) | 0.036 (0.384) |
| Mean I/I (outer shell) | 29.7 (2.3) |
| Completeness (outer shell), % | 93.7 (64.4)[[1]](#footnote-2) |
| Multiplicity (outer shell) | 4.1 (2.2) |
| No. non-hydrogen atoms | 7203 |
| Resolution used in refinement Å | 30-1.4 |
| Rcryst | 0.15 |
| Rfree | 0.17 |
| Rms deviation 1-2 bonds (Å) | 0.011 |
| Rms deviation 1-3 bonds (degrees) | 1.4 |
| Rms deviation chiral volume (Å3) | 0.10 |
| Avg main chain B (Å2) A mol / Bmol | 14.7/14.9 |
| Avg side chain B (Å2) A mol / Bmol | 15.9/16.1 |
| Avg ligand B (Å2) | 12 |
| Avg solvent B (Å2) | 26 |

1. Data are 100% complete to 1.58Å.. Incomplete data / reduced multiplicity in outer bin reflects data collected solely from the corners of a square detector. [↑](#footnote-ref-2)
